# Supplementary material for: Tobacco Smoke Exposure and Urinary Cadmium in Women from Northern Mexico
Source: MDPI journal article supplement (doi:10.3390/ijerph182312581), 2021-11-29
Supplement: s1 [file s1]

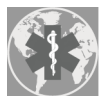

## Supplementary Materials

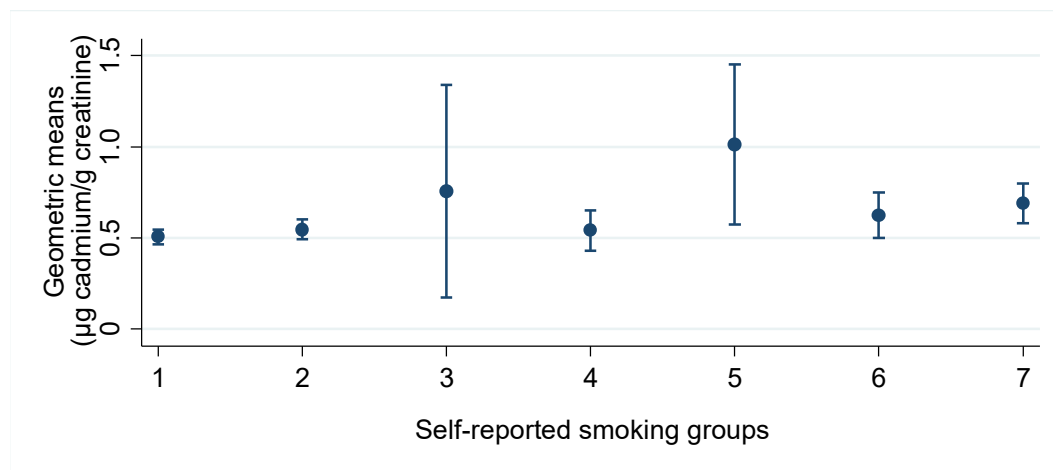

**Figure S1.** Adjusted cadmium geometric means among different self-reported smoking groups from model 3. 1 = Non-smoker without secondhand smoke exposure; 2 = Non-smoker with secondhand smoke exposure; 3 = Ex-smokers without secondhand smoke exposure <1 year of quitting; 4 = Ex-smokers without secondhand smoke exposure ≥1 year of quitting; 5 = Ex-smokers with secondhand smoke exposure <1 year of quitting; 6 = Ex-smokers with secondhand smoke exposure ≥1 year of quitting; 7 = Current smokers.

**Table S1.** Parameters of regression analysis between cadmium concentrations [ $\ln(\mu\text{g-cadmium/g-creatinine})$ ] and self-reported smoking groups.

| Model   | F (Prob > F) | R-squared | Adjusted R-squared | Root-mean-square deviation |
|---------|--------------|-----------|--------------------|----------------------------|
| Model 1 | 3.81 (0.000) | 0.030     | 0.022              | 0.787                      |
| Model 2 | 3.39 (0.000) | 0.048     | 0.034              | 0.782                      |
| Model 3 | 3.18 (0.000) | 0.049     | 0.033              | 0.783                      |

Model 1 adjusted by age; model 2 additionally adjusted by state of residence and education; model 3 additionally adjusted by breast cancer status.
